# Supplementary material
Source: publisher figshare collection journal article supplement (https://acs.figshare.com/ndownloader/files/5767044)

# Supporting Information for "Transfer of Chiral Information Through Molecular Assembly"

R. K. Castellano, C. Nuckolls, and J. Rebek, Jr.  
*J. Am. Chem. Soc.*

Arylurea **1** + L-Alanine **10** (1:1) in C<sub>6</sub>D<sub>6</sub><sup>a</sup>

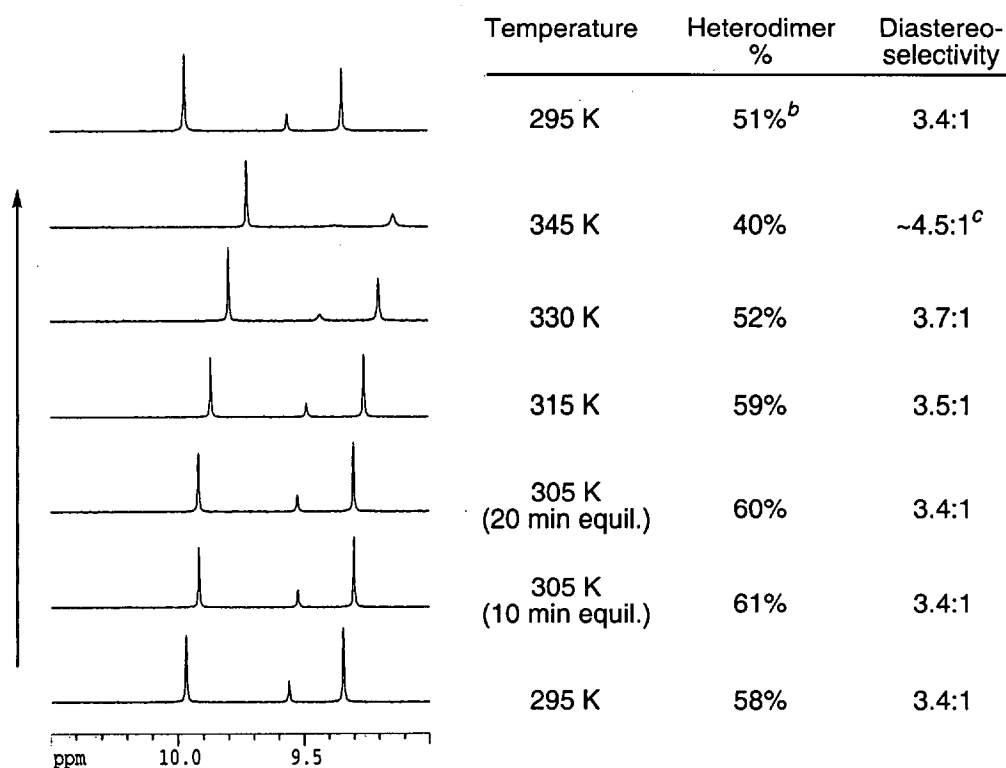

<sup>a</sup> 1.2 mM. <sup>b</sup> Considered the equilibrium percentage, as taken after sitting for 12h. A second sample, prepared at the same time, gave the same percentage after the 12h period. <sup>c</sup> The -NH peaks of the heterodimers became broad and could not be reliably integrated.

# ROESY Spectrum of Assembly **1•6** in C<sub>6</sub>D<sub>6</sub>, 1.4 mM

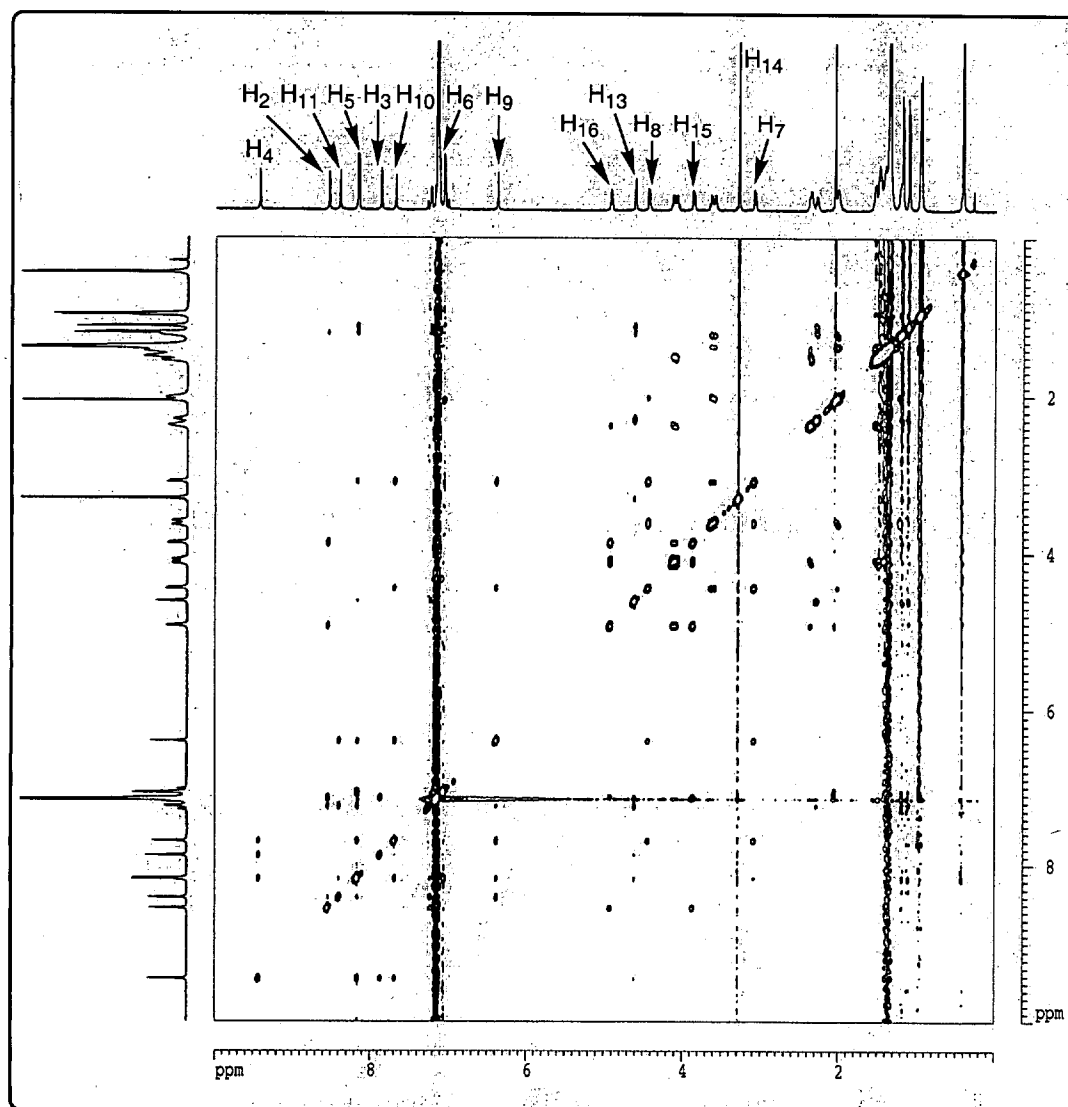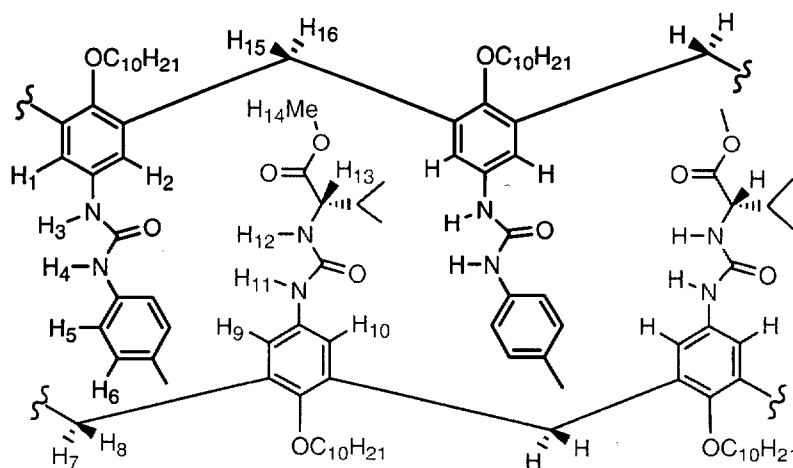

ROESY Spectrum of Assembly **1•5** in *p*-xylene-*d*<sub>10</sub>, 1.3 mM,  
with excess (*R*)-(+)-3-methylcyclopentanone

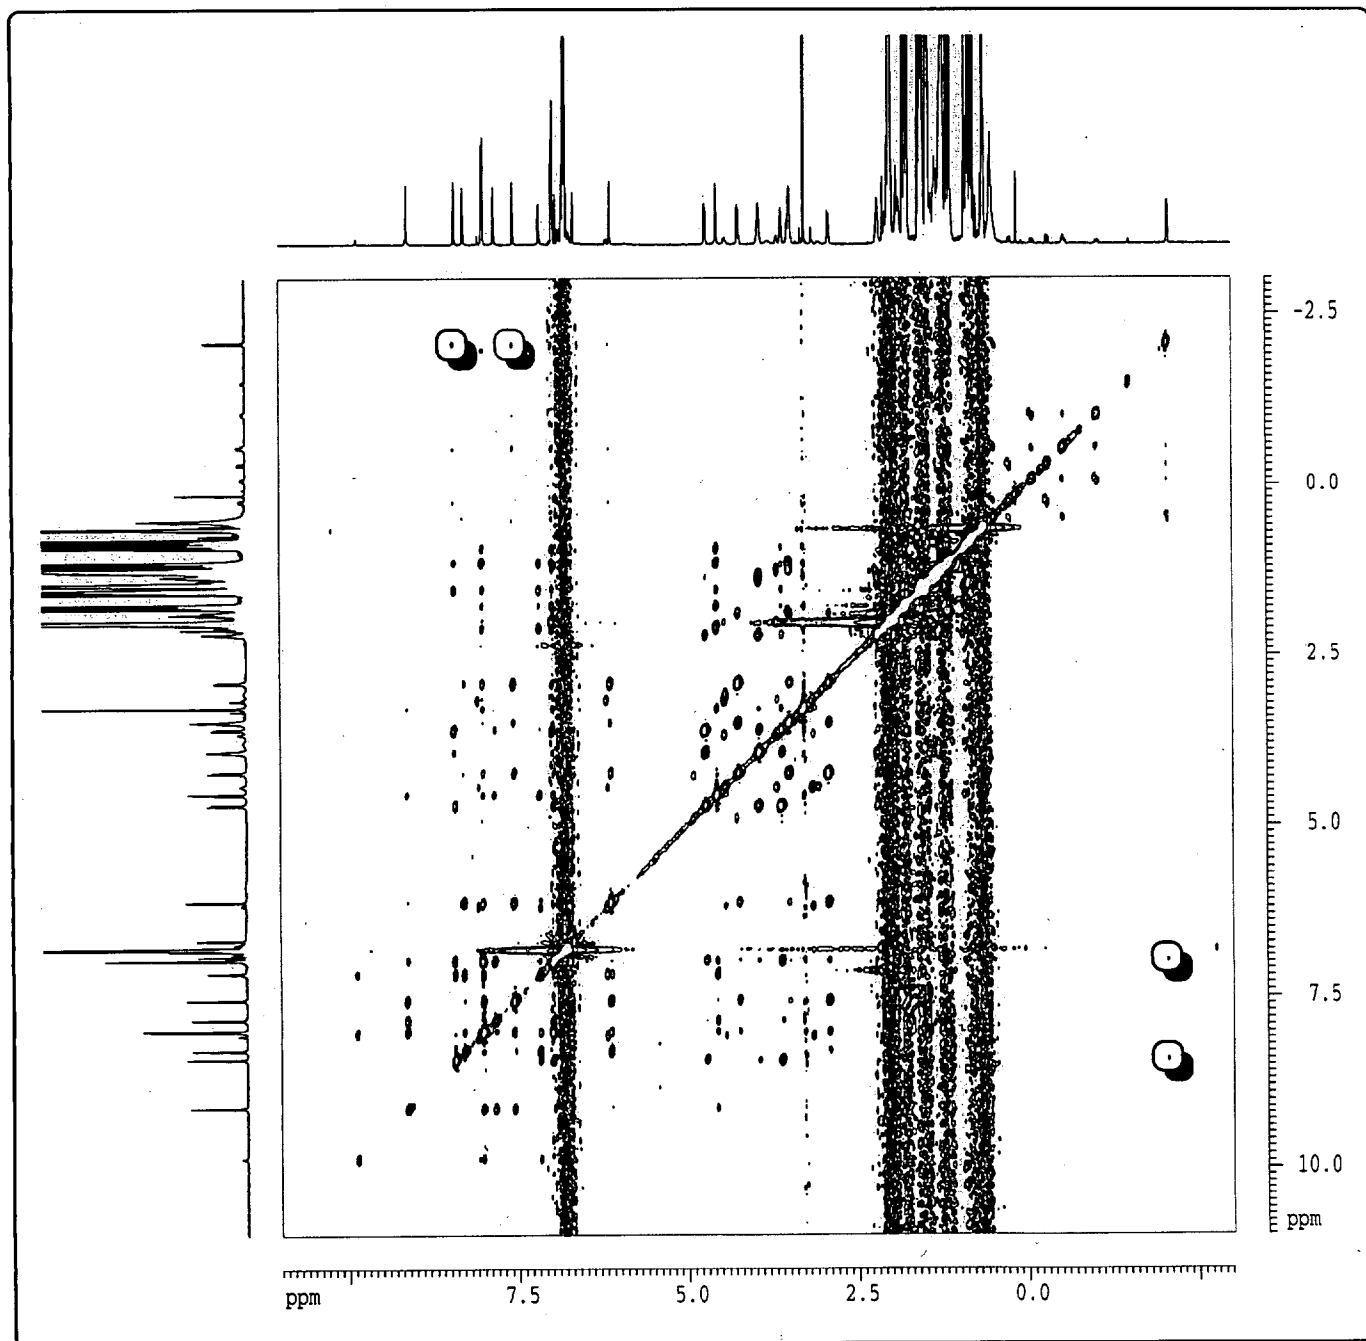

NOEs from the methyl group of the guest to the aromatic protons of the arylurea calixarene ( $H_1$  and  $H_2$  on the **1•6** ROESY) are as indicated. The NOE highlighted in gray does not appear symmetrically. Small resonances in the baseline arise from the homodimers.

Titration of **6** With Arylurea **1** in  $\text{CDCl}_3$  ( $c = 1.2 \times 10^{-4} \text{ M}$ ,  $l = 1 \text{ mm}$ )

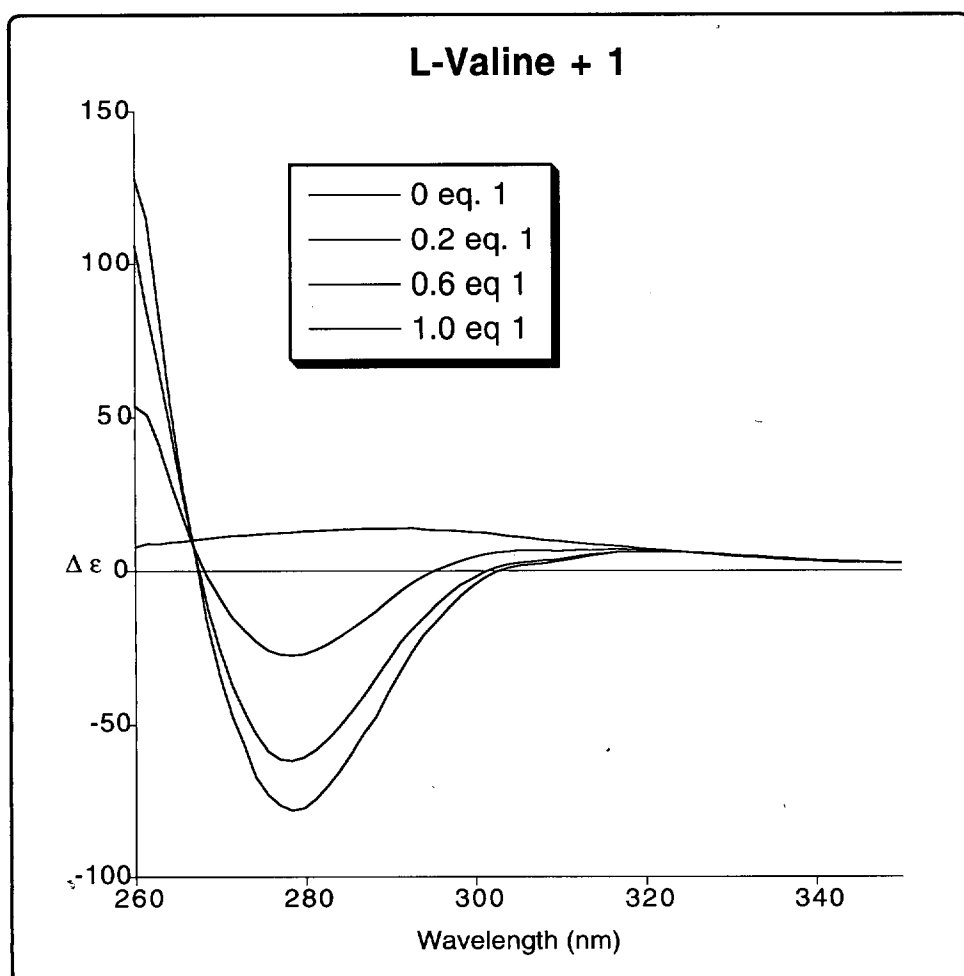

Supplement: Supplementary file 1 [file 5767044]
